# Supplementary material for: Sacred Waters, Broken Systems: Community Experiences of Traditional Water Body Renovations in Braj, India
Source: Research Square preprint supplement (doi:10.21203/rs.3.rs-7255433/v1), 2025-10-30
Supplement: Supplementary file 1 [file d8fd9018e11e8e79620017fe.docx]

# **Annexure 2- Thematic Analysis**

# **Table 1. RQ1 - Community Memories of Traditional Water Management**

| **Sr. No.** | **Theme** | **Definition** | **Code** | **Participant** | **Quote** | **Context** |
| --- | --- | --- | --- | --- | --- | --- |
| 01 | Sacred Geography and Religious Significance | Community memories frame kunds within a sacred cosmology where water bodies are repositories of religious meaning and spiritual practice | Divine Geography | P17 | "The Prem Sarovar is situated at the same place where Goddess Radha and Lord Krishna unknowingly met for the first time." | Religious significance of water bodies |
| Ritual Water Use | P01 | "The water of the kunds is used for achaman (ritual sipping of water)" | Sacred water practices |
| Water as Nectar | P15 | "The water of the kund was like amrit (nectar). There was no comparison to it" | Quality perception of sacred water |
| Funeral Rituals | P15 | "After performing a funeral, when people return from the cremation ground, they bathe in these kunds" | Life-cycle ritual practices |
| Festival Calendar | P17 | "Mostly for bathing during religious festivals. Each kund has a designated festival---like during Kartik, Chaitra, Vaishakh, Ashadha. Each had its day---Deh Kund, Vrishbhanu Kund, Kirti Kund, Gahvar Kund, Shyam Kund, etc. Bathing and viewing the kund (darshan) held great significance" | Temporal religious significance |
| Spiritual Ecology | P40 | "Kund is a part of nature. And nature is God. Not just we humans, but all creatures and living beings depend upon it" | Divine-nature relationship |
| 02 | Historical Continuity and Landscape Memory | Community narratives preserve detailed accounts of historical water bodies that sustained traditional water management. | Historical Numbers | P02 | "In our Govardhan, there used to be, at one time, 108 kunds. Today, hardly about 40-50 remain" | Water body decline |
| Royal Patronage | P03 | "The construction of the kunds was done by the kings, and it was they who would appoint a pandit at the kunds" | Historical governance |
| Scale Memory | P14 | "And now, understand this---that talab must have been at least one kilometre. The Mansarovar jheel used to be about one kilometre long. When we used to walk around it, we'd get tired---it was that big" | Historical water body size |
| Biodiversity Memory | P14 | "When we did the work in 1999, it used to be kaccha. There used to be many kinds of fish there, many kinds of flowers used to bloom, and there was a bird called the jal murgi (waterhen) that lived there too" | Historical ecosystem richness |
| Archaeological Evidence | P04 | "All our archaeological sites that we have discovered are found adjacent to some channel or canal. In fact, all the PGW (Painted Grey Ware) sites that are found are either near a river or a stream" | Long-term settlement patterns |
| 03 | Traditional Water Management and Ecological Knowledge Systems | Communities have sophisticated understanding of traditional water management that integrates hydrological knowledge with ecological principles | Redundant Systems | P35 | "There used to be talabs, there used to be pokhars (smaller ponds), and in the middle of them, a well used to be constructed. And this was done for the reason that, suppose the talab dried up, then water would still be available through the well" | Drought-proofing strategies |
| Water Purification | P15 | "For the purity of water, it's essential for sunlight to fall on the water, to be in contact with soil, and for the water to move" | Natural purification understanding |
| Tree-Water Relationship | P15 | "Trees absorb strength from the sun, from the cold, from hail, and from rain. That strength goes into their roots and then passes from the roots into the kund's water" | Vegetation-water quality connection |
| Water Body Classification | P37 | "A kund means small, a sarovar is bigger than a kund, and a jheel is bigger than a sarovar" | Taxonomic knowledge |
| Watershed Understanding | P12 | "The slope of the earth is towards the Yamuna, so the rain falling on the hill range of Kama and Deeg, the run-off water would cover all the kunds and finally go to the Yamuna River" | Hydrological systems knowledge |
| Cascade Systems | P12 | "There were multiple kunds at multiple levels. So water would go from one kund to another, to another, like that" | Multi-level water management |
| Soil Knowledge | P26 | "Clayey soil holds water" | Construction material understanding |
| Construction Techniques | P39 | "So our people used to take chikni mitti from there to build their homes... They would smoothen it by hand, so that even if rainwater fell on the walls, it would run down and cause no damage" | Integrated water-housing construction |
| 04 | Complex Social Organisation of Water Access and Community Use | Water systems reflected and supported complex social organisation through designed access patterns and community governance | Ghat Design | P41 | "At that time, every kund had a gau ghat, and another two or three ghats. The kund had one water source but four ghats. One ghat was called the dhobi ghat (washermen's ghat). One was the janana ghat (women's ghat), and one was the mardana ghat (men's ghat)" | Social organisation of access |
| Gendered Water Use | P38 | "Women used kunds for everything---from washing dishes to washing clothes, bathing, and drawing water. Men mostly just bathed there and took their cows and buffaloes to the kunds" | Gender-based water practices |
| Community Hub | P12 | "Until urbanisation had not happened. Until the dream of tankers and pipelines, the water supply system had not arrived. Till then, the kund was like a hub of community and rural activity" | Social centrality of water bodies |
| Economic Activities | P17 | "The dhobis (washermen) would bring clothes from the village and wash them right here. Earlier, it used to be that in the months of Kartika and Vaishakh, the dhobis would collect grains from the villagers. The Mahar caste people used to cultivate singhada (water chestnuts) in this pond earlier. Later, for some time, there was even fish farming" | Multi-functional economic use |
| 05 | Nostalgic Memory and Contrasts with Present Decline | Communities remember the abundance and purity of traditional systems while contrasting with contemporary water challenges | Water Beauty | P1 | "In earlier times, look, this Vrishbhanu Kund was very beautiful. Its water used to be very pure and plentiful. People, including us, used to bathe in it" | Aesthetic and quality memory |
| Drought Security | P20 | "All the water from the entire Chiksauli area...used to come into Bihar Kund...even if it didn't rain for three years, it still wouldn't dry" | Historical water security |
| Present Scarcity | P20 | "Fifty years ago, there were kunds in every village. Now people are removing them, so water scarcity is increasing, isn't it?" | Contemporary water crisis |
| Demographic Change | P11 | "At the time when these kunds were constructed, the population was very low. The needs were also few. But nowadays, what happens is that one person flushes the toilet six times in a day. Now, water cannot come from the kund" | Population and lifestyle impacts |
| Health Impact | P18, P25 | "Our bodies also had vigour because of it. Now, after drinking packaged and RO water, there is no strength left in the body" | Traditional water health benefits |
| Construction Quality | P25, P31, P33 | "Houses made of soil from the kunds were cool in Jyeshtha (May-June) and warm in winter. And now, in these pakka houses, even the air conditioner doesn't work properly" | Traditional construction advantages |

# **Table 2. RQ2 - Navigating Sacred Significance versus Physical Degradation**

| **Sr. No.** | **Theme** | **Definition** | **Code** | **Participant** | **Quote** | **Context** |
| --- | --- | --- | --- | --- | --- | --- |
| 06 | Ritual Persistence Despite Physical Degradation | Despite widespread recognition of water quality deterioration, community members continue to engage in ritual practices that require direct interaction with contaminated water. | Devotional Compulsion | P01 | "When we do the Parikrama, we do achaman with the water of the kunds. We do not check whether the water of the kund is clean or dirty, or whether dirty water is entering it or not. We perform achaman with devotion" | Ritual practice, regardless of contamination |
| Religious Obligation | P25 | "Since people come here because of bhav (devotion or sentiment), then they have to perform achaman. That's just a compulsion---they have to do it" | Mandatory nature of ritual practice |
| Sacred Water Value | P15 | "The most precious thing about a kund is its water" | Inherent value regardless of condition |
| Emotional Response | P41 | "When Darshanarthi (Pilgrims) come and daachman from the water, my eyes fill with tears... there's this special thing about this place---that if someone comes here with a vow, performs anushthan here, and if their vow wasn't fulfilled even in Nashik or other places, then they come here and complete their vow because their wishes have been fulfilled" | Emotional impact of witnessing ritual practices |
| 07 | Water Crisis and Encroachment of Sacred Space | Community narratives reveal acute awareness of how demographic pressure and infrastructure development have compromised traditional water systems | Population Impact | P01 | "When the population keeps increasing, the filth inevitably increases along with it... The more people who come here, the more filth will spread. Because it is human beings who generate filth" | Demographic pressure on environment |
| Animal Behavior | P01 | "You leave aside human beings---even animals and birds do not drink the water of the kunds anymore" | Severity of water contamination |
| Physical Encroachment | P4 | "In recent times, they have blocked the channels through which water enters the kunds. And then, as we are observing, the catchments around the kunds are also being encroached upon by people who are constructing houses there. Now, the kunds do not even have any water left" | Infrastructure blocking water flow |
| Water Stagnation | P15 | "The movement of water---its inflow and outflow---is ending. Water stagnates, turns foul, breeds mosquitoes, and becomes putrid" | Hydrological cycle breakdown |
| Artificial Solutions | P16 | "officials are forced to fill it artificially using an electric borewell pump" | Technology-dependent water management |
| Saline Water | P26 | "Underground water is very saline and not fit for drinking. But we are forced to drink it nonetheless. It's salty" | Poor quality alternative water sources |
| 08 | Ritual Pollution and Community Response | Religious offerings and practices sometimes contribute to the degradation of water quality while communities struggle to maintain sacred spaces | Offering Pollution | P22 | "This brother here---he threw his mala (rosary) into water. Whoever brings offerings here, putting flowers or such, leaves it right here" | Religious practices contributing to pollution |
| Public Behavior | P25 | "People are bathing naked in Govind Kund. Now it's been made dirty. The population has increased so much" | Inappropriate public behavior |
| Community Cleaning | P23 | "During festivals and also on regular days, cleaning is done around the kunds. Many times we have had the water removed, the filth removed, cleaning done" | Community maintenance efforts |
| Service as Devotion | P22 | "However much service is done, there is no greater bhajan, no greater penance than that" | Spiritual value of maintenance work |
| 09 | Alternative Water Sources | Communities have developed adaptive strategies to navigate water insecurity while maintaining relationships with traditional water bodies | Diversified Sources | P25 | "People fetch water from the fields... sometimes, if a tanker comes, they fill water from that too. Some people have installed RO systems... everyone is troubled by the water problem" | Multiple water source strategies |
| Municipal Supply | P25 | "Drinking water comes from the Nagar Palika tap installed in the street crossroad... pipeline doesn't reach every house, so people have to go and fetch it from there" | Limited public water access |
| Water Commercialisation | P41 | "What can I tell you now? The situation has become such that out of helplessness, people must buy drinking RO water" | Forced water purchasing |
| Government Scheme Failure | P41 | "Now, you see, this Namami Gange scheme that's going on-it's only filling the pockets of contractors... Nothing is happening. They laid down a pipeline, but it all broke down" | Failed government water programs |
| 10 | Hope for Revival and Cultural Restoration | Despite environmental degradation and institutional failures, communities maintain strong aspirations for restoring traditional water systems. | Future Recognition | P15 | "One day will come when people will cry out--By any means, save our kunds!'---just as now people are turning back to eating dalia (porridge) after abandoning chowmein and burgers" | Anticipated return to traditional systems |
| Attachment to Place | P15 | "Whether it's bird form or monkey form, but keep me in Braj itself" | Deep emotional attachment to region |
| Technical Compatibility | P14 | "Water recycling as a solution... 'It has nothing to do with religion.' If water recycling is done properly, even the Yamuna Ji (river) will become pure" | Modern technology with religious values |
| Restoration Benefits | P13 | "So if we can restore and revive these kunds according to their history, it could attract pilgrims. It could bring back the sanctity of the kund. People will be more respectful; they will not spoil it" | Multiple benefits of proper restoration |
| 11 | Confronting Ineffective Governance and Institutional Failures | Community experiences reveal systematic problems with governance approaches that rely heavily on technical solutions while marginalising community knowledge | Engineering Dominance | P14 | "Actually, what happens is that the government relies entirely on its engineers and contractors" | Technical approach prioritisation |
| Conflicting Purposes | P12 | "It will be criticised by environmentalists and heritage conservationists that you're not allowing natural water to get collected, and rather you're sucking water out of the earth to fill the kund. But then another purpose is to make the kund available for a holy bath" | Tension between approaches |
| Community Division | P11 | "And look, nowadays, what is happening is that the community itself is divided internally. There is no community leadership. The community---there is no real connection between the community and the kund. It is there because they see a piece of real estate in it" | Internal community fragmentation |
| Internal Opposition | P12 | "And what happens is that if you go to work there, half the people are with you and half the people are against you" | Community division hindering restoration |
| 12 | Emotional and Spiritual Response to Loss | The transformation of sacred water bodies generates profound motional responses that reveal the depth of community attachment to Kunds | Cultural Loss | P18 | "It affects the environment, health, and Braj's culture. The real beauty of Braj lies in its vans, hills, kunds and wells…they are my Radha and Krishna" | Deep emotional attachment to landscape |
| Fear of Retaliation | P41 | "Now, see how the administration operates. The one who goes to complain, they say to him, 'Yes, come along. We're coming with the JCB. Come along with us.' Now, think about it--you didn't know something, and someone gave you that information. But behind the scenes, the authorities are bringing you forward and making you stand publicly" | Administrative intimidation tactics |
| 13 | Loss of Traditional ractices and Knowledge | The transformation of water systems has contributed to broader erosion of traditional knowledge and practices, creating cascading cultural losses. | Construction Knowledge Loss | P29 | "Now no one builds like that anymore" | Disappearing traditional techniques |
| Changed Labour Relations | P31 | "And nowadays, you see, a hundred people are working to build a pond. And all those people are government labourers... Earlier, the digging of ponds happened without the government spending a single rupee" | Shift from community to wage labour |
| Cultural Homogenisation | P37 | “Kos Kos par badle paani aur chhar kos pe baani" (Every mile the water changes, and every four mile the language) | Loss of local cultural diversity |

# **Table 3. RQ3 - Unintended Consequences of Development Interventions**

| **Sr. No.** | **Theme** | **Definition** | **Code** | **Participant** | **Quote** | **Context** |
| --- | --- | --- | --- | --- | --- | --- |
| 14 | Artificiality and Technology-Driven Displacement of Traditional Systems | Modern development interventions have systematically displaced traditional water management approaches through technological solutions that undermine ecological foundations | Modern Resource Impact | P02 | "Ever since artificial works have begun, ever since the arrival of modern resources, the kunds have been vanishing" | Technology displacing traditional systems |
|  |  |  | Infrastructure Disruption | P03 | "And ever since this new system came in, like the laying of sewers and pipelines, the use of the kunds has reduced drastically" | Modern infrastructure reducing traditional use |
| Groundwater Depletion | P15 | "And as you know, the samarsebal (submersible pumps) are a very big reason. With a hand pump, at least a little less water is used. But samarsebal is a very big reason…water level going down very rapidly" | Technology accelerating water depletion |
| Borewell Dependency | P02 | "The government is not arranging for any water system. On every kund they are just installing borewells" | Quick technological fixes |
| Concretisation Impact | P15 | "Kunds that don't have trees along their banks nad because of concretisation of ghats---the water there isn't water, it's poison" | Ecological degradation from renovation |
| Historical Infrastructure | P12 | "When the British laid the Mathura railway line, they pierced through these catchment lands. They disturbed the slope systems. And then urbanisation completely ruined the channels that used to fill the kunds" | Colonial infrastructure disrupting systems |
| Centralised Dependency | P20 | "Now, everyone gets water through pipelines from Water Supply" | Shift to centralised systems |
| Emergency Measures | P27 | "Now water comes by tanker from the jungle. It is coming from the Waterworks" | System failures requiring emergency response |
| 15 | Bureaucratic Barriers and Institutional Corruption | Community experiences reveal systematic problems with governance institutions that prevent effective water management while creating opportunities for corruption | Top-down Decision Making | P02 | "For the past five years, the district administration itself has been doing all the work. They do not even ask us what work should be done, what work needs to be done, or what should not be done" | Exclusion from decision-making |
| Resource Misallocation | P04 | "Even in the name of purification of Yamuna and Kunds, crores of rupees have already been spent. But if anyone can show me if there has been any result except: 'Dhaak ke teen paat.' (The same three leaves of the drumstick tree)" | Large spending without results |
| Donation System Corruption | P15 | "That's how this donation money works---it completely confuses people because it comes without hard work. And it breeds cunning, scheming minds" | Corruption in funding systems |
| External NGO Preference | P14 | "Even when the government hires an NGO, they hire them from Lucknow. And all those IAS officers are associated have somekind of stakes with NGOs" | Systematic exclusion of local organisations |
| Land Record Manipulation | P12 | "By the criminal connivance of the patwaris (land record registrar) of revenue record department and the encroachers, several kunds have been converted to urban land" | Systematic land theft |
| Project Abandonment | P13 | "So they build the kunds and leave them, and they end up like orphans, back to zero" | Lack of maintenance after completion |
| 16 | Cosmetic versus Functional Restoration and Commodification of Sacred Heritage | Restoration approaches prioritise visual appeal and tourism accessibility over ecological functionality, creating water bodies that appear renovated while losing essential functions | Privatisation Impact | P01 | "As for Brajbhanu Kund, now it is this---that it has been given on tender to a private company. So why should I spend Nagar Panchayat's money on it?" | Reduced public investment |
| Beautification Priority | P04 | "When conservation has to be carried out for any kund, then a large fund is allocated for it. And the effort is to utilise as much of that fund as possible... So nowadays, when restoration is done, beautification is carried out. Lighting is installed. Banners and so on are put up. But I do not think that any work is done for the actual management of water resources" | Aesthetic over functional priorities |
| Beautification Focus | P06 | "Currently, we mostly do kund restoration, and even within restoration, it's primarily beautification work" | Government focus on appearance |
| Poor Construction | P22 | "Now, these chhatris, what it is, is that they're hollow from inside. Kids come and climb up on them, so they end up breaking. These are made only for show" | Non-functional decorative elements |
| Sacred Water Commodification | P12 | "These days, water from Yamunotri and Gangotri is selling like crasy in Delhi. Bottles are labelled Yamunotri, Gangotri, or Himalaya, and people are buying them for ₹100 to ₹500" | Market exploitation of sacred water |
| Ecological Destruction | P16 | "driven by a hunger for new construction, cut down the precious, mature trees. So they can earn hefty commissions from the vendors" | Construction prioritising profit over ecology |
| 17 | Exclusion of Local Knowledge and Changing Value Systems | Development interventions systematically exclude community knowledge while imposing external frameworks for understanding and managing water resources | Community Exclusion | P15 | "Ordinary people have no involvement in renovation at all. There is participation. It happens and is limited to meetings" | Limited meaningful participation |
| Religious Reductionism | P02 | "They don't ask us anything at all. They just look at the kunds as religious places. They simply view the kunds as having a religious form. But if you go and look, there is not even water in the kunds" | Reducing complex systems to religious symbols |
| External Expertise Priority | P15 | "Even NGOs don't speak to villagers. They value outsiders more. I will introduce you to people in nearby villages like Nandgaon---they'll tell you more" | Valuing external over local knowledge |
| Community Willingness | P15 | "Of course. If someone asks, villagers are always willing to support in restoration or cleanning of the kund. They will work with you if approached" | Unused community capacity |
| Tokenistic Participation | P24 | "perhaps they did get some signatures from us... but they didn't really ask us how they were planning the design" | Superficial consultation |
| Social Change Impact | P14 | "But now, people have become a bit lazy, and there's also the influence of Western thinking. Plus, water has now reached people's homes" | Changed social attitudes |
| Government Dependency | P14 | "And the villagers don't feel much impact from this issue. The rest simply think that the government will do something. And they themselves don't want to take ownership or responsibility" | Reduced community ownership |
| 18 | Systemic Development Critique and Transformation of Sacred Space | Community members articulate sophisticated critiques of development logic that reveal understanding of how modern approaches fundamentally alter social-ecological relationships | Development as Destruction | P02 | "We are fixing the early date of destruction through hyper-rapid development. The ultimate end of development is destruction" | Critique of development paradigm |
| Interconnected Problems | P02 | "These are all problems interconnected with one another. You should understand that the entire layer of soil on the surface has become polluted... Entire generations are getting ruined" | Systemic environmental crisis |
| Access Restrictions | P19 | "Kund water cannot be used for bathing or for cattle purposes because a watchman stays there. There is a prohibition on doing anything like that" | Restricting traditional use patterns |
| Land Grabbing Priority | P2 | "The priority is not to restore, maintain, beautify, and give pleasure to the community or pilgrims. The priority is to grab land and convert it to commercial building space, and that's a tragedy" | Commercial interests over restoration |
| Poor Heritage Quality | P16 | "red stone gate erected by the Braj Teerth Vikas Parishad was of such poor quality that it began breaking and collapsing from day one" | Superficial heritage commitment |
| Integration Advocacy | P18 | "We must preserve nature and tradition. Artificial systems bring illness, environmental damage, and spiritual decay. Even science, if it moves beyond its bounds, will harm nature" | Call for balanced approach |
| 19 | Hydrological Disruption and Ecological Crisis | Development interventions have created cascading ecological disruptions that extend far beyond individual water bodies to affect regional hydrological systems. | Infrastructure Disruption | P15 | "For example, in some places, for highways, the ground level has been raised by eight feet. And you can see how much that has disrupted the balance there" | Infrastructure altering hydrology |
| Deforestation Impact | P14 | "That too is bad. Haven't you seen---where are the trees left? The trees that used to be there---pipal, banyan---they all used to be there" | Loss of ecological support |
| Environmental Suffering | P25 | "Narak bhog raha hai gaon" (The village is experiencing hell) | Community experiencing environmental crisis |
| Ecosystem-wide Crisis | P25 | "The cows are dying of thirst. Humans are dying of thirst. The herons are dying of thirst. The birds are dying of thirst... All paths have been blocked to the kunds and ponds" | Universal water crisis impact |
| Imitative Development | P40 | "We are merely copying foreign countries" | Inappropriate development models |
| Future Crisis Prediction | P04 | "The relevance of kunds will always remain... But 20-30 years from now, when the shortage of water will become extreme, then people will regret that what they did was wrong. Then, the significance of kunds for people will once again be underlined" | Anticipated water crisis |
| 20 | State Power and Community Powerlessness | Development interventions operate through state power that marginalises community agency while creating new forms of vulnerability and displacement. | Authoritarian Governance | P26 | "What happens from anyone wanting or not wanting something? Now, whatever the government decides, that is what will happen" | Community powerlessness |
| Fear of Retaliation | P25 | "If you (public) don't want it, then go to hell. If you (interviewer) want to go and tell them, then go to the police station. ‘Pettai ho jaegi’ (You will get beaten up) and even in all possibilities, the bulldozer will run then" | State intimidation tactics |
| Debt-driven Displacement | P41 | "The entire settlement built around the Jai Kund consists of people who gave their lands to the landlords due to debt. And the landlords told them about this place here for free, saying, 'No one will trouble you here'" | Economic displacement to water body areas |
| 21 | Community Agency and Resistance | Despite systematic marginalisation, communities demonstrate persistent agency and demand for restoration approaches that recognise their knowledge and needs. | Restoration Demand | P12 | "Today, we have a waitlist of hundreds of villages wanting us to restore their kunds" | High community demand for restoration |
| Direct Appeals | P12 | "Bauji hamao kund aur banwa deo." ("Sir, please renovate our kund too.") | Community actively seeking help |
| Local Governance Pressure | P13 | "Then the Gram Sabha committee faces pressure from the villagers, in various ways" | Community exercising pressure |
| Direct Demant | P41 | "What to do? I myself have told the officials. I said to them: 'Sir, you people are educated officers who have come here after studying... All we are requesting is that you come once to Jait. Go there and do aachman (ritual sip) from that kund. In response, he just smiled and left" | Community challenging officials with experiential knowledge |
