# Supplementary material for: Sacred Waters, Broken Systems: Community Experiences of Traditional Water Body Renovations in Braj, India
Source: Research Square preprint supplement (doi:10.21203/rs.3.rs-7255433/v1), 2025-10-30
Supplement: Supplementary file 2 [file dfe5b01c8d47b506aabc4d00.docx]

# **Annexure 1: Semi-Structured Interview Questions by Representative Categories**

## **[Note:** *These are indicative questions and may not have been asked to every representative. Based on the conversation flow, the sequencing of some questions might be changed based on the situation and the participants' openness and comfort. The questions were originally asked in Hindi and Braj Bhasha.***]**

1. **Common Questions for All Representatives**
   1. What is the historical significance and traditional purpose of kunds in Braj?
   2. Could you describe the traditional water management systems and the methods/tools used for water extraction and construction?
   3. What were the historical conditions of water quality and the methods used to maintain it naturally?
   4. Who traditionally built and maintained these water bodies, and how was labour organised?
   5. What is the current status of kunds in Braj?
   6. What are the major factors contributing to the deterioration and disappearance of kunds today?
   7. How is the groundwater level situation now?
   8. What are the environmental, social, and health impacts of the degradation and loss of kunds on the Braj region and its inhabitants?
   9. What are the proposed solutions or recommendations for addressing water scarcity and ensuring sustainable water management in Braj?
   10. What is the future outlook for kunds – do you believe they can be revived, and what would be required for this?
   11. How do you view the balance between 'modern development' and 'traditional ways' in water management?
2. **Government Officials**
   1. Who are the key actors currently involved in kund restoration and management?
   2. What is the primary focus of modern restoration projects?
   3. What are the challenges and criticisms of current restoration approaches?
   4. How is water currently sourced for restored kunds?
   5. What is the extent of local community consultation and participation in these modern restoration projects?
   6. How does the work being done on kunds relate to or report on Sustainable Development Goals (SDGs)?
3. **NGO, Think Tank Representatives and Social Workers**
   1. Who are you currently involved with in kund restoration and management?
   2. What is the primary focus of restoration projects?
   3. What are the challenges and criticisms of current restoration approaches, including funding issues, quality of work, design choices and the effectiveness of large-scale government schemes?
   4. How is water currently sourced for restored kunds, and what are the preferred or problematic methods for their recharge?
   5. What is the extent of local community consultation and participation in these restoration projects?
   6. How do issues of land records, corruption, and political interests influence kund preservation and restoration efforts?
   7. How do marginalised communities currently access water resources?
   8. What are the gender dimensions of water collection and management?
   9. How do economic pressures influence community participation in conservation efforts?
4. **Religious Figures**
   1. What is the religious and spiritual significance of kund for you and the people?
   2. What ritual practices are you involved in, and are people also involved in performing rituals?
   3. How do you and religious institutions contribute to kund preservation and restoration?
   4. What traditional knowledge about water purification and maintenance exists in religious texts and practices?
   5. How were religious institutions historically involved in building and maintaining kunds?
   6. How have the religious uses of kunds changed from traditional to present-day practices?
   7. Were you involved or consulted in the restoration of Kund? (Asked only to people whose kunds were restored)
5. **Local Community Members**
   1. Can you describe how kunds were used during your childhood or by previous generations?
   2. What changes have you observed in local water bodies over your lifetime?
   3. Who traditionally built and maintained these water bodies?
   4. How have the uses of kunds changed in your daily life and community practices?
   5. What traditional occupations related to water management existed in your area?
   6. How do caste dynamics and land ownership influence access to water in your community?
   7. How do settlement patterns of different communities relate to water access?
   8. What is your experience with new restoration projects in your area?
   9. How much consultation did you have in planning restoration efforts?
   10. How was water quality maintained in the past?
   11. What traditional water management practices do you think should be revived?
   12. What are the main problems you face regarding water access and quality today?
   13. What environmental changes have you observed that affect local water bodies?
